# Supplementary material for: Transitional justice and authoritarian backsliding
Source: Springer Nature journal article supplement (doi:10.1007/s10602-020-09315-5), 2020-08-17

| <b>PURGES</b>      | <b>1989</b>          | <b>1990</b> | <b>1991</b>               | <b>1992</b>                     | <b>1993</b> | <b>1994</b>                                            |
|--------------------|----------------------|-------------|---------------------------|---------------------------------|-------------|--------------------------------------------------------|
| Bulgaria           | Not yet democratized |             | 0                         | 0 Leadership purge positive x 2 |             | 0                                                      |
| Romania            |                      | 0           | 0                         | 0                               | 0           | 0                                                      |
| East Germany       | Not yet democratized |             | 0                         | 0                               | 0           | 0                                                      |
| Hungary            | Not yet democratized |             | 0 Thorough purge positive |                                 | 0           | 0 Thorough purge positive x 2; thorough purge negative |
| Czechoslovakia     |                      | 0           | 0 Thorough purge positive |                                 | 0           | 0                                                      |
| Poland             |                      | 0           | 0                         | 0 Leadership purge positive     |             | 0                                                      |
| <b>LUSTRATIONS</b> |                      |             |                           |                                 |             |                                                        |
|                    | <b>1989</b>          | <b>1990</b> | <b>1991</b>               | <b>1992</b>                     | <b>1993</b> | <b>1994</b>                                            |
| Bulgaria           | Not yet democratized |             | 0                         | 0                               | 0           | 0                                                      |
| Romania            |                      | 0           | 0                         | 0                               | 0           | 0                                                      |
| East Germany       | Not yet democratized |             | 0 Lustration positive x 2 | Lustration positive             |             | 0                                                      |

|                |                      |   |   |                                              |                                              |   |                                              |
|----------------|----------------------|---|---|----------------------------------------------|----------------------------------------------|---|----------------------------------------------|
| Hungary        | Not yet democratized | 0 | 0 | Lustration positive                          | 0                                            | 0 | Lustration positive x 2; lustration negative |
| Czechoslovakia |                      | 0 | 0 | Lustration positive x 2; Lustration negative | Lustration positive x 2; Lustration negative | 0 | 0                                            |
| Poland         |                      | 0 | 0 | 0                                            | Lustration positive x 3; Lustration negative | 0 | Lustration negative                          |

---

| 1995 | 1996 | 1997                                | 1998 | 1999 | 2000 | 2001 |
|------|------|-------------------------------------|------|------|------|------|
|      | 0    | 0 Thorough<br>purge<br>positive x 1 |      | 0    | 0    | 0    |
|      | 0    | 0                                   | 0    | 0    | 0    | 0    |

|  |   |   |   |                                 |   |   |
|--|---|---|---|---------------------------------|---|---|
|  | 0 | 0 | 0 | 0                               | 0 | 0 |
|  | 0 | 0 | 0 | 0 Thorough<br>purge<br>positive | 0 | 0 |

|  |   |   |   |   |   |   |
|--|---|---|---|---|---|---|
|  | 0 | 0 | 0 | 0 | 0 | 0 |
|  | 0 | 0 | 0 | 0 | 0 | 0 |

| 1995 | 1996                                                | 1997                   | 1998                         | 1999                     | 2000                   | 2001 |
|------|-----------------------------------------------------|------------------------|------------------------------|--------------------------|------------------------|------|
| 0    | 0 Lustration<br>positive;<br>lustration<br>negative | Lustration<br>negative |                              | 0 Lustration<br>positive | Lustration<br>positive |      |
| 0    | 0                                                   | 0                      | 0 Lustration<br>positive x 3 | Lustration<br>positive   |                        | 0    |

|  |   |   |   |   |   |   |
|--|---|---|---|---|---|---|
|  | 0 | 0 | 0 | 0 | 0 | 0 |
|--|---|---|---|---|---|---|

|   |                                                     |                          |   |   |
|---|-----------------------------------------------------|--------------------------|---|---|
| 0 | 0 Lustration<br>positive;<br>lustration<br>negative | 0 Lustration<br>positive | 0 | 0 |
|---|-----------------------------------------------------|--------------------------|---|---|

|                                                       |                          |                        |                                                       |                            |                                                           |
|-------------------------------------------------------|--------------------------|------------------------|-------------------------------------------------------|----------------------------|-----------------------------------------------------------|
| Lustration<br>positive x 2;<br>Lustration<br>negative | 0 Lustration<br>positive | Lustration<br>positive | Lustration<br>positive x 2;<br>Lustration<br>negative | Lustration<br>positive x 6 | Lustration<br>positive x 2;<br>lustration<br>negative x 2 |
|-------------------------------------------------------|--------------------------|------------------------|-------------------------------------------------------|----------------------------|-----------------------------------------------------------|

|                              |                                                           |                                                       |   |   |   |
|------------------------------|-----------------------------------------------------------|-------------------------------------------------------|---|---|---|
| 0 Lustration<br>positive x 2 | Lustration<br>positive x 2;<br>Lustration<br>negative x 2 | Lustration<br>positive x 2;<br>Lustration<br>negative | 0 | 0 | 0 |
|------------------------------|-----------------------------------------------------------|-------------------------------------------------------|---|---|---|

---

| 2002                                                  | 2003                       | 2004                   | 2005                     | 2006                              | 2007                                                | 2008 |
|-------------------------------------------------------|----------------------------|------------------------|--------------------------|-----------------------------------|-----------------------------------------------------|------|
|                                                       | 0                          | 0                      | 0                        | 0                                 | 0                                                   | 0    |
|                                                       | 0                          | 0                      | 0                        | 0 Leadership<br>purge<br>positive |                                                     | 0    |
|                                                       | 0                          | 0                      | 0                        | 0                                 | 0                                                   | 0    |
|                                                       | 0                          | 0                      | 0                        | 0                                 | 0                                                   | 0    |
|                                                       | 0                          | 0                      | 0                        | 0                                 | 0                                                   | 0    |
|                                                       | 0                          | 0                      | 0                        | 0                                 | 0                                                   | 0    |
|                                                       | 0                          | 0                      | 0                        | 0                                 | 0                                                   | 0    |
| 2002                                                  | 2003                       | 2004                   | 2005                     | 2006                              | 2007                                                | 2008 |
| Lustration<br>positive;<br>Lustration<br>negative x 2 | 0                          | 0                      | 0                        | 0 Lustration<br>positive x 2      | 0                                                   | 0    |
|                                                       | 0                          | 0                      | 0 Lustration<br>positive | Lustration<br>positive x 2        | 0 Lustration<br>negative;<br>lustration<br>positive |      |
| Lustration<br>positive;<br>lustration<br>negative     | Lustration<br>Positive x 2 | Lustration<br>positive |                          | 0 Lustration<br>positive          | 0                                                   | 0    |

|                                                           |                                                   |   |                        |   |   |   |
|-----------------------------------------------------------|---------------------------------------------------|---|------------------------|---|---|---|
| Lustration<br>positive x 3;<br>Lustration<br>negative x 2 | Lustration<br>positive;<br>lustration<br>negative | 0 | lustration<br>negative | 0 | 0 | 0 |
|-----------------------------------------------------------|---------------------------------------------------|---|------------------------|---|---|---|

|                            |                        |   |                        |   |   |   |
|----------------------------|------------------------|---|------------------------|---|---|---|
| Lustration<br>positive x 2 | Lustration<br>positive | 0 | Lustration<br>positive | 0 | 0 | 0 |
|----------------------------|------------------------|---|------------------------|---|---|---|

|                                                       |                        |   |   |   |   |   |
|-------------------------------------------------------|------------------------|---|---|---|---|---|
| Lustration<br>positive;<br>Lustration<br>negative x 2 | Lustration<br>positive | 0 | 0 | 0 | 0 | 0 |
|-------------------------------------------------------|------------------------|---|---|---|---|---|

---

| 2009 | 2010                              | 2011 | 2012                                                              | 2013                                                            | 2014 | 2015 |
|------|-----------------------------------|------|-------------------------------------------------------------------|-----------------------------------------------------------------|------|------|
|      | 0                                 | 0    | 0                                                                 | 0                                                               | 0    | 0    |
|      | 0 Leadership<br>purge<br>negative |      | 0 Thorough<br>purge<br>positive;<br>Thorough<br>purge<br>negative | Thorough<br>purge<br>positive;<br>Thorough<br>purge<br>negative |      | 0    |
|      | 0                                 | 0    | 0                                                                 | 0                                                               | 0    | 0    |
|      | 0                                 | 0    | 0                                                                 | 0                                                               | 0    | 0    |

|  |   |   |   |   |   |   |
|--|---|---|---|---|---|---|
|  | 0 | 0 | 0 | 0 | 0 | 0 |
|  | 0 | 0 | 0 | 0 | 0 | 0 |

| 2009 | 2010                     | 2011 | 2012 | 2013 | 2014 | 2015 |
|------|--------------------------|------|------|------|------|------|
|      | 0                        | 0    | 0    | 0    | 0    | 0    |
|      | 0 Lustration<br>negative |      | 0    | 0    | 0    | 0    |
|      | 0                        | 0    | 0    | 0    | 0    | 0    |

0 0 0 0 0 0 0

0 0 0 0 0 0 0

0 0 0 0 0 0 0

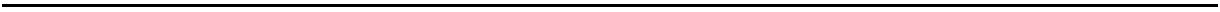



---

**2016**

---

0

0

0

0

0

0

**2016**

0

0

0

0

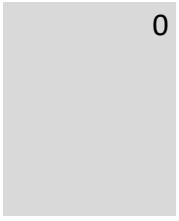

0

0

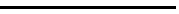

Supplement: MOESM1 [file 18289980]
